1 **RNA-dependent RNA polymerase speed and fidelity are not the only determinants of the**  
2 **mechanism or efficiency of recombination**

3

4 Running Title: RdRp determinants of recombination

5

6 Hyejeong Kim<sup>1</sup>, Victor D. Ellis III, Andrew Woodman, Yan Zhao, Jamie J. Arnold<sup>1</sup>, Craig E.  
7 Cameron<sup>1</sup>

8 Department of Biochemistry and Molecular Biology, The Pennsylvania State University, 201 Althouse  
9 Laboratory, University Park, PA 16802

10

11 <sup>1</sup> Present address: Department of Microbiology and Immunology, School of Medicine, University of  
12 North Carolina at Chapel Hill, 125 Mason Farm Rd., Chapel Hill, NC 27599-7290

13

14 # Corresponding author: Craig E. Cameron, [craig.cameron@med.unc.edu](mailto:craig.cameron@med.unc.edu) Tel: 919-966-9699

15

16

17

18

19

20

21

22

23

24

## 25 **Abstract**

26 Using the RNA-dependent RNA polymerase (RdRp) from poliovirus (PV) as our model system, we  
27 have shown that Lys-359 in motif-D functions as a general acid in the mechanism of nucleotidyl  
28 transfer. A K359H (KH) RdRp derivative is slow and faithful relative to wild-type enzyme. In the  
29 context of the virus, RdRp-coding sequence evolves, selecting for the following substitutions: I331F  
30 (IF, motif-C) and P356S (PS, motif-D). We have evaluated IF-KH, PS-KH, and IF-PS-KH viruses and  
31 enzymes. The speed and fidelity of each double mutant are equivalent. Each exhibits a unique  
32 recombination phenotype, with IF-KH being competent for copy-choice recombination and PS-KH  
33 being competent for forced-copy-choice recombination. Although the IF-PS-KH RdRp exhibits  
34 biochemical properties within twofold of wild type, the virus is impaired substantially for  
35 recombination in cells. We conclude that there are biochemical properties of the RdRp in addition to  
36 speed and fidelity that determine the mechanism and efficiency of recombination. The interwoven  
37 nature of speed, fidelity, the undefined property suggested here, and recombination makes it impossible  
38 to attribute a single property of the RdRp to fitness. However, the derivatives described here may  
39 permit elucidation of the importance of recombination on the fitness of the viral population in a  
40 background of constant polymerase speed and fidelity.

41

## 42 **Significance**

43 The availability of a “universal” method to create attenuated viruses for use as vaccine strains would  
44 permit a rapid response to outbreaks of newly emerging viruses. Targeting RdRp fidelity has emerged  
45 as such a universal approach. However, because polymerase fidelity and speed are inextricably linked,  
46 the effort to attribute the attenuated phenotype to a single biochemical property of the RdRp may be  
47 futile. Here, we show that this circumstance is even more complex. We provide evidence for the  
48 existence of a biochemical parameter that combines with fidelity and speed to govern the mechanism

49 and/or efficiency of recombination. We conclude that the field will be served best by continued  
50 emphasis on discovery of manipulatable functions of the RdRp instead of debating the importance of  
51 individual properties.

52

## 53 **Introduction**

54 In spite of the substantial resources that have been allocated by the National Institute of Allergy and  
55 Infectious Diseases and the Centers for Disease Control and Prevention to support prediction of  
56 emerging viral pathogens ([https://www.niaid.nih.gov/research/emerging-infectious-diseases-](https://www.niaid.nih.gov/research/emerging-infectious-diseases-pathogens)  
57 pathogens), viral outbreaks over the past few decades have been caused by viruses for which  
58 surveillance was not considered a priority. Rapid response to an outbreak caused by an unexpected  
59 viral pathogen requires, minimally, the existence of broad-spectrum, antiviral therapeutics. Prevention  
60 requires the availability of vaccines, development of which could take years. Indeed, approved  
61 vaccines still do not exist to prevent infections by West Nile virus or severe acute respiratory syndrome  
62 (SARS) coronavirus, and these outbreaks occurred more than one decade ago.

63 Because all RNA viruses encode an RNA-dependent RNA polymerase (RdRp) with conserved  
64 function and mechanism, this enzyme has emerged as an attractive target for development of broad-  
65 spectrum therapeutics (1-3) and a target for function/mechanism-based strategies for viral attenuation  
66 (4-9). One function/mechanism of the RdRp that has been targeted most is that required for faithful  
67 incorporation of nucleotides (4-9). Changing RdRp fidelity decreases or increases the genetic variation  
68 of the viral population, which, in turn, decreases fitness and virulence of the viral population (10-15).

69 Known RdRp variants exhibiting a high-fidelity phenotype can also exhibit a reduced speed of  
70 nucleotide incorporation, at least at the biochemical level (16). Replication speed is also a determinant  
71 of viral fitness and virulence (17). So, is it the increased fidelity or decreased speed of nucleotide

72 addition that gives rise to the attenuated phenotype? Further complicating the fidelity-versus-speed  
73 question are the recent observations that changes to fidelity also have consequence for the efficiency of  
74 recombination (18-23). Increased RdRp fidelity decreases recombination efficiency and vice versa  
75 (18-23). It will likely be impossible to attribute a single biochemical property of the RdRp to  
76 biological outcome.

77 The most extensively studied PV fidelity mutants encode RdRps with amino acid substitutions at  
78 sites remote from the active site. Constructing equivalent substitutions conferring equivalent  
79 phenotypes in RdRps other than PV is difficult if not impossible. Our laboratory has therefore pursued  
80 active-site-based strategies to manipulate the fidelity, speed, and/or recombination efficiency of the  
81 RdRp (24). We have shown that a lysine (Lys-359 in PV) present in conserved structural motif D of  
82 the RdRp contributes to the efficiency of nucleotidyl transfer (24). A PV mutant encoding a K359R  
83 RdRp is attenuated but elicits a protective immune response in mice that is at least as robust as the  
84 immune response elicited by the type 1 Sabin vaccine strain (6).

85 In this study, we characterize a second motif-D mutant of PV (K359H). Unlike the K359R RdRp-  
86 encoding virus (6), K359H PV is genetically unstable and acquires mutations encoding two second-site  
87 amino acid substitutions after a few passages in cell culture. Together, the two substitutions restore all  
88 biochemical properties of the derivative to near wild-type levels. Individually, however, we observe  
89 differences in the mechanism (copy-choice vs. forced-copy-choice) and efficiency of recombination by  
90 each derivative, although each derivative exhibits equivalent speed and fidelity. We conclude that  
91 biochemical properties in addition to speed and fidelity must exist and contribute to both the  
92 mechanism and efficiency of recombination. The desire to attribute single, biochemical properties of  
93 the viral RdRp to fitness, virulence, and pathogenesis may be futile.

94

## 95 **Results**

### 96 *K359H PV requires two second-site substitutions to restore a “wild-type” growth phenotype*

97 Most studies of RdRp fidelity have benefited from the selection of derivatives that were either  
98 more or less sensitive to a mutagenic nucleoside (25-30). Almost invariably, the derivatives changed  
99 residues remote from the catalytic site, thus using an allosteric mechanism to perturb fidelity. Among  
100 the most famous of these is the G64S substitution in PV RdRp (15, 16, 26). Many years ago, our  
101 laboratory showed that the active site of all polymerases contain a general acid, Lys-359 in the case of  
102 PV RdRp, that protonated the pyrophosphate leaving group during nucleotidyl transfer, thereby  
103 increasing the catalytic efficiency of RdRp (24). Substitutions of Lys-359 in PV RdRp give rise to  
104 changes in fidelity (6, 17). The arginine substitution of Lys-359 (K359R RdRp) and the histidine  
105 substitution (K359H RdRp) catalyze nucleotidyl transfer at a rate 10-fold lower than wild type (24).  
106 The impact of the arginine substitution of Lys-359 on PV fidelity and its potential application to  
107 vaccine development have been described (6).

108 Biological studies of K359H PV were not reported, because this virus was not genetically  
109 stable. When PV is rescued from in vitro transcribed RNA, four passages are required for the genetic  
110 diversity of the viral population to come to equilibrium (10). During this time for K359H PV,  
111 mutations were observed in RdRp-coding sequence that changed the plaque phenotype of the virus.  
112 One change was in motif C, I331F, and the other change was in motif D, P356S (**Figs. 1A and 1B**). In  
113 order to compare the impact of these substitutions on PV genome replication without complication of  
114 reversion, we engineered the various substitutions into a subgenomic replicon, producing luciferase as  
115 an indirect measure of viral RNA produced. Experiments in the presence of guanidine hydrochloride  
116 (GuHCl) report on translation of transfected RNA in the absence of replication (**Fig. 1C**). Relative to  
117 WT PV, K359H was the most debilitated, with replication failing to reach an end point at 10 h post-

118 transfection (**Fig. 1C**). Each double mutant was markedly better than K359H alone, but the addition of  
119 I331F conferred a greater replication advantage than P356S (**Fig. 1C**). The triple mutant replicated  
120 even faster but still exhibited a significant reduction in the rate of replication relative to WT (**Fig. 1C**).

### 121 *Characterization of the double- and triple-mutant viruses and their polymerases*

122 At multiplicities of infection of one or higher, the double- and triple-mutant viruses were stable  
123 for multiple passages, thus permitting us to characterize the biological properties of these viruses. We  
124 have adopted the following nomenclature to refer to the various mutant PVs and their corresponding  
125 RdRps: I331F-K359H, IF-KH; P356S-K359H, PS-KH; and I331F-P356S-K359H, IF-PS-KH.  
126 Interestingly, the growth properties of the viruses were not as expected based on the experiments with  
127 the replicon. Each mutant virus exhibited the same delay relative to WT virus prior to the first  
128 detection of infectious virus after four hours post-infection (hpi) (**Fig. 2A**). Thereafter, growth of each  
129 virus was far more distinct than observed for the replicon, with PS-KH PV much slower than IF-KH  
130 PV and IF-PS-KH PV was substantially faster than both double mutants (**Fig. 2A**). The differences in  
131 outcome could reflect the differences in replication efficiency and/or a direct consequence of the  
132 substitutions in 3D-coding sequence on virus assembly or spread caused by changes to 3CD protein or  
133 3D-containing precursor protein (31, 32).

134 Our studies of RdRp fidelity mutants in cell culture have highlighted the fact that the use of the  
135 plaque-forming unit (PFU) as a measure of virus concentration will mask changes in the specific  
136 infectivity of the viral RNA (10). As a result, our experiments generally use genomes instead of PFU  
137 as the unit of measure (10). In doing so, we can use genomes/PFU as a measure of the specific  
138 infectivity of the virus and surrogate for virus fitness. The instability of KH PV precluded rigorous,  
139 quantitative analysis of this virus, but at least 10-fold more KH PV than WT PV was required to  
140 observe a comparable number of plaques. Both substitutions were able to increase the efficiency of

141 plaque formation relative to KH PV (**Fig. 2B**). Indeed, the specific infectivity of IF-KH PV was  
142 equivalent to WT. The addition of PS to IF-KH reduced the efficiency of plaque formation; the  
143 specific infectivity of IF-PS-KH PV was reduced by twofold relative to IF-KH PV (**Fig. 2B**).  
144 Therefore, the exaggerated behavior of PS-KH PV in the PFU-based growth assay relative to the  
145 replicon assay likely reflects an additional defect to virus assembly and/or spread.

146 A change to the specific infectivity of the viral RNA caused by increased mutational load—that  
147 is, reduced fidelity of the PS-KH RdRp, would also explain the observed reduction in the specific  
148 infectivity of PS-KH PV relative to the other mutant PVs. To test this possibility, we evaluated the  
149 sensitivity of each virus population to growth in the presence of ribavirin. We reasoned that the  
150 mutagenic activity of ribavirin would exhibit the greatest negative impact on viruses with a mutator  
151 phenotype as described previously (10). Relative to WT, K359H PV exhibited the highest fidelity  
152 based on the 2-log difference in sensitivity to ribavirin (**Fig. 2C**). IF-KH and PS-KH PVs also  
153 exhibited a higher fidelity than WT PV (**Fig. 2C**). Importantly, both mutants exhibited essentially  
154 equivalent fidelity phenotypes (**Fig. 2C**), consistent with the suggestion above that the reduced  
155 efficiency of plaque formation observed for PS-KH PV is likely related to impairment of virus  
156 assembly and/or spread. Finally, evaluation of IF-PS-KH PV revealed equivalent sensitivity of this  
157 mutant to ribavirin as observed for WT PV (**Fig. 2C**), suggesting that fidelity had been returned to  
158 normal.

159 We have previously reported biochemical properties of the RdRps for the repertoire of mutant  
160 viruses described above (17). Consistent with these reports, each substitution increases the speed and  
161 reduces the fidelity to create a biochemical phenotype on par with that observed for WT (**Fig. 2D**).

162 *Biochemical properties of the RdRp other than speed and fidelity contribute to the efficiency of*  
163 *recombination in cell culture.*

164 Based on the myriad RdRp fidelity mutants that have been reported to date, there appears to be  
165 a direct correlation between the rate of nucleotide addition (speed) and the fidelity of nucleotide  
166 addition (6, 10, 17, 22, 33). This correlation also extends to recombination efficiency (22). If this is  
167 the case, then the ongoing debate of speed versus fidelity as the key determinant of viral fitness will  
168 become even more complicated to resolve (17).

169 The current state of the art for evaluation of recombination in cell culture is based on the co-  
170 transfection of two viral (sub)genomic RNAs incapable of producing infectious virus (34). The donor  
171 RNA is a replication-competent, subgenomic RNA that encodes a luciferase reporter instead of the  
172 viral capsid (**Fig. 3A**). The acceptor RNA is a replication-incompetent, genomic RNA that has a  
173 defective cis-acting replication element, termed oriI (**Fig. 3A**) (34). Initiation of replication on the  
174 donor followed by a switch to the acceptor at a site after the oriI locus will yield an infectious genome  
175 that can be scored by plaque assay (**Fig. 3A**) (34).

176 We evaluated our panel of KH-containing PV mutants using this assay, and the outcomes were,  
177 in most cases, quite unexpected (**Fig. 3B**). KH PV was unable to produce viable recombinants, as  
178 expected for a high-fidelity RdRp (22). The first surprise was that IF-KH and PS-KH PVs did not  
179 exhibit the same phenotypes (**Fig. 3B**). While IF-KH PV produced viable recombinant virus, PS-KH  
180 PV did not (**Fig. 3B**). Based on the experiments performed above, these viruses and their polymerases  
181 replicate with comparable efficiency and fidelity (**Figs. 1A, 2C, and 2D**). Even more surprising,  
182 however, was the observation that IF-PS-KH PV was impaired more than one log relative to WT PV in  
183 its ability to produce viable recombinants (**Fig. 3B**). The replication efficiency and fidelity of this virus  
184 and its polymerase were always within twofold of that observed for WT (**Figs. 1A, 2C, and 2D**).  
185 Together, these results suggest that there are properties of the PV RdRp important for recombination  
186 that are not revealed by our existing biological and biochemical assays.



187 The one caveat of the recombination assay is that the recombinant viruses produced must be  
188 able to form plaques, which may mean that the recombinant virus must spread by a lytic mechanism. It  
189 was possible that PS-KH PV was defective for virus assembly and/or spread, at least lytic spread (**Fig.**  
190 **2B**). In order to score for recombinant viruses that spread by either a lytic or non-lytic mechanism, we  
191 engineered the acceptor template to encode the UnaG (35) green fluorescent protein (**Fig. 3C**). The  
192 polyprotein was designed such that UnaG protein is released from capsid precursor protein by 3C  
193 protease activity. Observation of green cells were visible from a donor-acceptor pair producing WT  
194 RdRp as early as 7 hpi, with increases continuing over a 48-h period (**Fig. 3D**). With the sensitivity of  
195 this assay and the absence of a requirement for lytic spread, it is clear that PS-KH PV exhibits a  
196 recombination defect (**Fig. 3D**).

197 *Poly(rU) polymerase activity as a predictor of the efficiency of copy-choice recombination in cell*  
198 *culture*

199 Twenty years ago, we showed that template switching was the primary mechanism of product  
200 formation when oligo(dT) or oligo(rU) were used to prime poly(rU) RNA synthesis on oligo(rA) or  
201 poly(rA) RNA templates (36). Briefly, polymerase engages a primed template, elongates that primer,  
202 disengages from the first template at some point during the elongation process to engage a second  
203 (acceptor) template and continue RNA synthesis (**Fig. 4A**) (36). This process occurs reiteratively,  
204 yielding products that are much greater than the average length of template used in the reaction (36).

205 The observation that only a subset of the KH mutants were competent for recombination,  
206 presumably by a copy-choice mechanism (37), provided the opportunity to determine the extent to  
207 which the poly(rU) polymerase activity can predict biological phenotypes. The congruence between  
208 the two experiments was remarkable (**Fig. 4B**). Both KH and PS-KH RdRps were impaired for  
209 poly(rU) polymerase activity, both IF-KH and IF-PS-KH RdRps exhibited near-WT levels of poly(rU)

210 polymerase activity (**Fig. 4B**). These results further confirm template switching as the primary  
211 mechanism of poly(rU) polymerase activity and validate this assay as a screen for identification of  
212 RdRps with deficits in template switching.

213 *Polymerase determinants supporting efficient copy-choice recombination do not overlap completely*  
214 *with determinants supporting efficient forced-copy-choice recombination*

215 Recently, our laboratory developed an assay for forced-copy-choice recombination (22, 38),  
216 inspired by an analogous assay developed to study template switching by the reverse transcriptase from  
217 human immunodeficiency virus (39-41). The concept of the assay and templates used are presented in  
218 **Fig. 5A**. The experimental design is diagrammed in **Fig. 5B**. Polymerase assembles on the primed  
219 template (sym/sub-U). In the presence of only the first nucleotide (ATP), the assembled complexes can  
220 be identified as the one-nucleotide-extended product (n+1). Addition of the remaining nucleotides in  
221 the absence or presence of the acceptor template will yield a strong-stop RNA product. In the presence  
222 of a complementary acceptor RNA, the strong-stop RNA product (donor) will be extended, creating a  
223 transfer product.

224 We evaluated each KH-containing RdRp derivative in this assay. Substrate and product  
225 analysis are presented in **Fig. 5C**, with the quantitation of the transfer product relative to WT presented  
226 in **Fig. 5D**. KH RdRp was defective in this assay as well, as transfer product was not detected (**Fig.**  
227 **5C**). Importantly, the failure to transfer was not a reflection of the inability to assemble or produce  
228 strong-stop donor RNA (**Fig. 5C**). In this assay, PS-KH RdRp outperformed IF-KH RdRp, and PS-KH  
229 and IF-PS-KH RdRp were essentially identical in activity.

230 We conclude that copy-choice and forced-copy-choice recombination use distinct mechanisms,  
231 requiring unique biochemical properties of the RdRp.

232

## 233 Discussion

234 For more than a decade now, our laboratory and others have published studies asserting  
235 connections between viral RdRp fidelity and viral fitness (10-15). However, in the few instances in  
236 which RdRp derivatives exhibiting perturbed fidelity have been characterized, these derivatives also  
237 exhibit changes to the rate of nucleotide addition (6, 10, 17, 22, 33). Relative to wild-type polymerase,  
238 a higher fidelity polymerase is a slower enzyme, and a lower fidelity polymerase is a faster enzyme (6,  
239 10, 17, 22, 33). Polymerase speed will clearly determine replication kinetics and therefore can  
240 contribute to viral fitness, as has been suggested recently (17). The most extensively characterized  
241 fidelity mutants of PV harbor an RdRp with a substitution located at a remote site that likely causes  
242 substantial collateral damage, further confounding the fidelity-versus-speed debate (4, 16). This study  
243 was motivated by the need to understand better the relationship between the biochemical properties of  
244 the viral RdRp and viral fitness, virulence, and pathogenesis. We have had in hand for a long time a  
245 PV mutant whose speed and fidelity were perturbed by changing an RdRp active-site residue, K359H  
246 (24). We did not publish this PV mutant until now because of its genetic instability (**Fig. 1A**). We  
247 realized that this genetic instability might actually represent an opportunity, as the biochemical  
248 phenotypes reverted by the second-site suppressors might highlight the biochemical properties driving  
249 viral fitness.

250 Lys-359 protonates the pyrophosphate leaving group during nucleotidyl transfer (24, 42). The  
251 K359H substitution will change the efficiency of that protonation event for two reasons. First, the pKa  
252 value of histidine is substantially lower than lysine and will therefore not be protonated to the same  
253 extent. Second, the distance between the nucleotide phosphates and the imidazole ring of the histidine  
254 will be greater than that of the amino group of lysine. It is likely that the distance is more of an issue,  
255 because K359R PV is stable and K359R RdRp exhibits the same reduction in catalytic efficiency as

256 K359H RdRp (6). The changes of I331F and P356S in motifs C and D, respectively, may serve to  
257 move His-359 closer to the nucleotide phosphates.

258 Each substitution (IF and PS) individually increased the replication efficiency of K359H PV, with  
259 the combination of the two substitutions producing an additive outcome (**Fig. 1C**). Each substitution  
260 also decreased the fidelity of nucleotide addition in cells, as assessed by ribavirin sensitivity, to the  
261 same extent; the combination mutant yielded a virus with properties on par with wild type (**Fig. 2C**).  
262 The observed changes to replication speed and fidelity for the mutant viruses were explained by the  
263 biochemical properties of the corresponding RdRps (**Fig. 2D**). As observed in the past, both speed and  
264 fidelity appear to be correlated.

265 The substitutions at the active site of the polymerase do not only affect replication efficiency  
266 and population diversity but also impact other stages of the lifecycle. The kinetics of virus production  
267 for the different mutants did not correspond directly to the kinetics of replication (compare **Fig. 2A** to  
268 **Fig 1C**). Virus production was significantly delayed for PS-KH PV (**Fig. 2A**). This issue with virus  
269 production manifests as a substantial decrease in the specific infectivity of this virus (**Fig. 2B**). One  
270 possible explanation for this outcome is that the RdRp is encoded by the 3D region of the viral genome  
271 and this region is also a component of the PV 3CD protein. The 3CD protein has well established roles  
272 in aspects of the lifecycle before, during, and after replication, including virion morphogenesis (31, 32,  
273 43, 44). Observations such as these highlight the additional level of complexity associated with  
274 establishing a cause-and-effect relationship between biochemical properties of the RdRp and fitness,  
275 virulence, and/or pathogenesis.

276 We and others have observed correlations between RdRp fidelity and recombination efficiency,  
277 with higher fidelity suppressing recombination and vice versa (18-23). An unexpected outcome of this  
278 study was the observation that IF-KH and PS-KH PVs exhibit substantially different propensities for

279 recombination in cells (**Fig. 3B**), in spite of very similar speed and fidelity phenotypes in cells (**Fig. 1C**  
280 and **Fig. 2C**) and in vitro (**Fig. 2D**). PS-KH PV appeared to be completely incapable of supporting  
281 recombination in cells (**Fig. 3B**). Because the cell-based recombination assay requires the ability of  
282 virus to plaque, it was conceivable that the defect of PS-KH PV was more a reflection of spread than  
283 impaired recombination. We established a more sensitive fluorescence-based assay (**Fig. 3C**), which  
284 also indicated impaired recombination (**Fig. 3D**). The impact of the PS substitution on recombination  
285 was also quite evident in the context of IF-PS-KH PV. The biological and biochemical properties of  
286 this triple mutant are within twofold of wild type (**Figs. 1** and **2**), but the recombination efficiency of  
287 this mutant is down by 30-fold relative to WT PV (**Fig. 3B**). Together, these observations support the  
288 existence of biochemical properties of the RdRp other than speed and fidelity that are essential for  
289 recombination and impaired by changing Pro-356 to Ser. Further characterization of these mutants will  
290 be required to identify this undefined biochemical property.

291 Our laboratory has had a longstanding interest in the mechanism of recombination (18, 19, 22, 36,  
292 38). We have shown that the high poly(rU) polymerase activity of PV RdRp derives from template  
293 switching during elongation, thus mimicking copy-choice recombination (**Fig. 4A**) (36). A second  
294 assay that we developed is based on template switching from the end of template, thus mimicking  
295 forced-copy-choice recombination (**Fig. 5A**) (22, 38). Based on the mutants and corresponding RdRp  
296 derivatives reported here, high fidelity impairs both types of recombination (see K359H in **Figs. 4B**  
297 and **5D**). Interestingly, unique RdRp determinants exist for each mode of recombination. PS-KH  
298 RdRp is impaired for copy-choice recombination (**Fig. 4B**); IF-KH is impaired for forced-copy-choice  
299 recombination (**Fig. 5D**). Impairment of recombination by PS-KH PV in cells is consistent with  
300 template switching as the primary mechanism of copy-choice recombination in cells, as demonstrated  
301 by Kirkegaard and Baltimore (37). The observation that IF-KH PV fails to exhibit a wild-type

302 recombination phenotype (**Fig. 3B**) may suggest that forced-copy-choice recombination contributes to  
303 recombination in cells as well.

304 The current narrative of the characterized PV mutants impaired for recombination is that  
305 recombination acts as a mechanism to purge deleterious mutations in the viral population (45-47). Our  
306 study reveals several caveats for the interpretation of these previous studies. There are known and  
307 unknown biochemical properties of the RdRp that determine recombination efficiency, and there are at  
308 least two distinct mechanisms of recombination. Without understanding these complexities for the  
309 mutants under investigation, it is difficult to compare one study to another and may explain disparate  
310 observations made between laboratories (48, 49). Further analysis of the panel of mutants reported  
311 here may help to resolve the controversy but should illuminate how changes to the mechanism and  
312 efficiency of recombination impact viral evolution in a background of constant speed and fidelity.

313 Viral fitness, virulence, and pathogenesis are determined collectively by the structure, dynamics,  
314 and activity of all virus-encoded functions. The conserved structure, dynamics, and mechanism of the  
315 viral RdRp makes this enzyme an attractive target for development of attenuated viruses by changing  
316 conserved residues capable of perturbing conserved, biochemical function (6, 8, 10). As a field, we  
317 have focused on RdRp fidelity (6) but have come to the realization that RdRp speed should not be  
318 ignored (17). This study shows that speed, fidelity, and undefined biochemical properties of the RdRp  
319 exist and contribute to both the mechanism and efficiency of recombination (**Fig. 6**). This inextricable  
320 connection of the myriad biochemical properties of the RdRp precludes attribution of a single  
321 biochemical property to viral fitness, virulence, and pathogenesis (**Fig. 6**). The field will be served best  
322 by continued emphasis on discovery of manipulatable functions of the RdRp, and other viral enzymes,  
323 instead of debating the importance of individual properties.

324

## 325 **Materials and Methods**

326 *Cells and Viruses.* Adherent monolayers of HeLa and L929 fibroblasts were grown in DMEM/F-12  
327 media. Media was supplemented with 100 U/mL penicillin, 100 µg/mL streptomycin, and 10% heat  
328 inactivated (HI)-FBS. All cells were passaged in the presence of trypsin-EDTA. Wild-type and  
329 recombinant PV viruses were recovered after transfection of RNA produced *in vitro* (see below) from  
330 full-length cDNA or from the CRE-REP assay parental partners (22). PV type 1 (Mahoney) was used  
331 throughout this study (Genbank accession number: V01149.1).

332

333 *Plasmids, in vitro transcription, cell transfection, and virus quantification.* All mutations were  
334 introduced into the pET26Ub-PV 3D (50) bacterial expression plasmids using overlap extension PCR.  
335 The presence of the desired mutations and the absence of additional mutations were verified by DNA  
336 sequencing. The expression plasmid encoding the various mutations was digested and inserted into an  
337 intermediate plasmid, pUC18-BglII-EcoRI-3CD (referred as pUC-3CD in (51)), and then the fragment  
338 between BglII and ApaI was cloned into the subgenomic replicon, pRLucRA, or viral cDNA, pMovRA  
339 or PV1ΔCRE. PV1ΔCRE is a full-length PV type 1 (Mahoney) cDNA bearing 8 synonymous  
340 substitutions in the oriI *cis*-acting replication element (CRE) located in the 2C-coding region and was  
341 described previously (22). In order to create a fluorescence-based assay for recombination in cells, we  
342 modified the PV1ΔCRE acceptor RNA to include the coding sequence for UnaG green fluorescent  
343 protein. Briefly, UnaG-encoding sequence (35) carrying a 3C protease cleavage site at its carboxyl  
344 terminus was inserted between the IRES and the P1 region of the PV sequence. Translation occurred  
345 from the natural poliovirus initiation codon. Proteolytic cleavage and release of the fluorescent protein  
346 occurred by normal 3C protease activity. Plasmids encoding PV genomes (full length or subgenomic)  
347 were linearized with ApaI. All linearized cDNAs were transcribed *in vitro* using T7 RNA Polymerase

348 and treated with 2U DNase Turbo (ThermoFisher) to remove residual DNA template. The RNA  
349 transcripts were purified using RNeasy Mini Kit (Qiagen) before spectrophotometric quantification.  
350 Purified RNA in RNase-free H<sub>2</sub>O was transfected into either HeLa or L929 fibroblasts using  
351 TransMessenger (Qiagen). Virus yield was quantified by plaque assay. Briefly, cells and media were  
352 harvested at 2-3 days post-transfection, subjected to three freeze-thaw cycles, and clarified. Supernatant  
353 was then used on fresh HeLa cells in 6-well plates; virus infection was allowed to continue for 30 min.  
354 Media was then removed, and cells were washed twice with PBS (pH 7.4) washes before a 0.8% (w/v)  
355 agarose-media overlay was added. Cells were incubated for 2-3 days and then fixed and stained with  
356 crystal violet for virus quantification.

357

358 *Luciferase assays.* Subgenomic luciferase assays were performed as described previously (32).

359

360 *Virus sequencing.* Viral RNA was extracted from clarified culture supernatant using a Qiagen  
361 RNeasy Mini kit, reverse transcribed using Superscript II reverse transcriptase (Invitrogen) using an  
362 oligo-dT primer according to the manufacturer's protocol. PCR amplification of the 3D<sup>pol</sup> region in PV  
363 used template cDNA and appropriate oligonucleotides as listed in Table 1 by using Phusion high-  
364 fidelity DNA polymerase (NEB) according to the manufacturer's protocol. PCR products were gel  
365 purified and sequenced by the Genomics Core Facility of the Pennsylvania State University.

366

367 *One-step growth analysis.* HeLa cells in 12-well plates were infected by each virus at a MOI of 10.  
368 Following a 30-minute incubation, cells were washed twice with PBS and media was replaced. Virus  
369 was harvested at different time-points post infection and the virus yield was quantified by plaque assay.

370



371 *Quantitative RT-PCR.* Viral RNA was purified from virus stocks by using QiaAmp viral RNA  
372 purification kit (Qiagen) and used for RT-qPCR to determine genome copies. This analysis was  
373 performed by the Genomics Core Facility of the Pennsylvania State University. DNase- treated RNA  
374 was reverse-transcribed using the High Capacity cDNA Reverse Transcription kit (Applied  
375 Biosystems, Foster City CA) following the protocol provided with the kit. Quantification by real-time  
376 qPCR was done with 2X TaqMan Universal PCR Master Mix (Applied Biosystems, Foster City CA) in  
377 a volume of 20  $\mu$ L, with primers 5'- ACCCCTGGTAGCAATCAATATCTTAC-3'(forward) and 5'-  
378 TTCTTTACTTCACCGGGTATGTCA-3' (reverse), and probe 5'-[6-Fam]  
379 TGTGCGCTGCCTGAATTTGATGTGA-3' in a 7300 Real-Time qPCR System (Foster City CA)  
380 machine. A standard curve was generated using in vitro transcribed RNA.

381 *Ribavirin-sensitivity assay.* This assay was described previously (48). HeLa cells were treated with 600  
382  $\mu$ M ribavirin for 1 h before infection. Ribavirin-treated cells were then infected at MOI 0.1 with each  
383 virus variant. Following infection, the cells were washed with PBS and media was replaced with  
384 ribavirin. Infection was allowed for 24 h. Cells and supernatant were subjected to three freeze-thaw  
385 cycles. Media was clarified and used for plaque assays. All yields were normalized to an untreated  
386 control.

387

388 *Cell-based recombination assay.* This assay was developed in the laboratory of David Evans and was  
389 used as described previously (22, 34). L929 fibroblasts were transfected with the PV donor and  
390 acceptor RNAs, both carrying the same mutations in the RdRp gene. For the fluorescence-based  
391 detection of recombinants, the UnaG green fluorescence reporter was encoded by the acceptor RNA.  
392 Supernatant at 2~3 days post-transfection was used to infect HeLa cells. Recombinant viruses were  
393 either quantified by plaque assay or by fluorescence imaging (488nm (ex) and 509 nm (em)).

394

395 *Polymerase expression and purification.* Purified polymerases used for biochemical analysis were  
396 prepared as described previously (50, 51).

397

398 *Poly(rU) polymerase activity assay.* Reactions contained 50 mM HEPES, pH 7.5, 10 mM 2-  
399 mercaptoethanol, 5 mM MgCl<sub>2</sub>, 60 μM ZnCl<sub>2</sub>, dT<sub>15</sub> (2 μM), poly(rA) (100 μM AMP), UTP (500 μM),  
400 [α-<sup>32</sup>P]UTP (0.2 μCi/μL), and PV RdRp (0.2 μM). Reactions were initiated by addition of PV RdRp  
401 and incubated at 30 °C for 5 min at which time the reactions were quenched by addition of EDTA to a  
402 final concentration of 50 mM. Reaction volumes were 50 μL. Products were analyzed by DE81 filter  
403 binding, where 10 μL of the quenched reaction was spotted onto DE81 filter paper discs and dried  
404 completely. The discs were washed three times for 10 min in 250 mL of 5% dibasic sodium phosphate  
405 and rinsed in absolute ethanol. Bound radioactivity was quantitated by liquid scintillation counting in 5  
406 mL of Ecoscint scintillation fluid (National Diagnostics).

407

408 *sym/sub-based template switching assay.* The sym/sub assay has been described previously (22, 36).  
409 Elongation complexes were assembled by incubating 5 μM PV RdRp with 1 μM sym/sub RNA primer-  
410 template and 500 μM ATP for 5 min (Mix 1). Template-switching reactions were initiated by addition  
411 of 60 μM RNA acceptor template and 500 μM CTP, GTP and UTP (Mix 2) and then quenched at  
412 various times by addition of 50 mM EDTA. All reactions were performed at 30 °C in 50 mM HEPES,  
413 pH 7.5, 10 mM 2-mercaptoethanol, 60 μM ZnCl<sub>2</sub>, and 5 mM MgCl<sub>2</sub>. Products were analyzed by  
414 denaturing polyacrylamide gel electrophoresis, visualized using a PhosphorImager, and the transfer  
415 products quantified using ImageQuant TL software (GE Healthcare).

416

## 417 **Acknowledgements**

418 This study was supported by a grant (AI45818) from NIAID, NIH to CEC. AW is the recipient of a  
419 fellowship (18POST33960071) from the American Heart Association (AHA).

420

## 421 **References**

- 422 1. Graci JD, Cameron CE. 2008. Therapeutically targeting RNA viruses via lethal mutagenesis.  
423 *Future Virol* 3:553-566.
- 424 2. Perales C, Domingo E. 2016. Antiviral Strategies Based on Lethal Mutagenesis and Error  
425 Threshold. *Curr Top Microbiol Immunol* 392:323-39.
- 426 3. Furuta Y, Gowen BB, Takahashi K, Shiraki K, Smee DF, Barnard DL. 2013. Favipiravir (T-  
427 705), a novel viral RNA polymerase inhibitor. *Antiviral Res* 100:446-54.
- 428 4. Cameron CE, Moustafa IM, Arnold JJ. 2016. Fidelity of Nucleotide Incorporation by the RNA-  
429 Dependent RNA Polymerase from Poliovirus. *Enzymes* 39:293-323.
- 430 5. Lee CA, August A, Arnold JJ, Cameron CE. 2016. Polymerase Mechanism-Based Method of  
431 Viral Attenuation. *Methods Mol Biol* 1349:83-104.
- 432 6. Weeks SA, Lee CA, Zhao Y, Smidansky ED, August A, Arnold JJ, Cameron CE. 2012. A  
433 Polymerase mechanism-based strategy for viral attenuation and vaccine development. *J Biol*  
434 *Chem* 287:31618-22.
- 435 7. Graham RL, Becker MM, Eckerle LD, Bolles M, Denison MR, Baric RS. 2012. A live,  
436 impaired-fidelity coronavirus vaccine protects in an aged, immunocompromised mouse model  
437 of lethal disease. *Nat Med* 18:1820-6.
- 438 8. Vignuzzi M, Wendt E, Andino R. 2008. Engineering attenuated virus vaccines by controlling  
439 replication fidelity. *Nat Med* 14:154-61.

- 440 9. Li C, Wang H, Yuan T, Woodman A, Yang D, Zhou G, Cameron CE, Yu L. 2018. Foot-and-  
441 mouth disease virus type O specific mutations determine RNA-dependent RNA polymerase  
442 fidelity and virus attenuation. *Virology* 518:87-94.
- 443 10. Korboukh VK, Lee CA, Acevedo A, Vignuzzi M, Xiao Y, Arnold JJ, Hemperly S, Graci JD,  
444 August A, Andino R, Cameron CE. 2014. RNA virus population diversity, an optimum for  
445 maximal fitness and virulence. *J Biol Chem* 289:29531-44.
- 446 11. Rozen-Gagnon K, Stapleford KA, Mongelli V, Blanc H, Failloux AB, Saleh MC, Vignuzzi M.  
447 2014. Alphavirus mutator variants present host-specific defects and attenuation in mammalian  
448 and insect models. *PLoS Pathog* 10:e1003877.
- 449 12. Zeng J, Wang H, Xie X, Li C, Zhou G, Yang D, Yu L. 2014. Ribavirin-resistant variants of  
450 foot-and-mouth disease virus: the effect of restricted quasispecies diversity on viral virulence. *J*  
451 *Virol* 88:4008-20.
- 452 13. Gnadig NF, Beaucourt S, Campagnola G, Borderia AV, Sanz-Ramos M, Gong P, Blanc H,  
453 Peersen OB, Vignuzzi M. 2012. Coxsackievirus B3 mutator strains are attenuated in vivo. *Proc*  
454 *Natl Acad Sci U S A* 109:E2294-303.
- 455 14. Coffey LL, Beeharry Y, Borderia AV, Blanc H, Vignuzzi M. 2011. Arbovirus high fidelity  
456 variant loses fitness in mosquitoes and mice. *Proc Natl Acad Sci U S A* 108:16038-43.
- 457 15. Vignuzzi M, Stone JK, Arnold JJ, Cameron CE, Andino R. 2006. Quasispecies diversity  
458 determines pathogenesis through cooperative interactions in a viral population. *Nature* 439:344-  
459 8.
- 460 16. Arnold JJ, Vignuzzi M, Stone JK, Andino R, Cameron CE. 2005. Remote site control of an  
461 active site fidelity checkpoint in a viral RNA-dependent RNA polymerase. *J Biol Chem*  
462 280:25706-16.

- 463 17. Fitzsimmons WJ, Woods RJ, McCrone JT, Woodman A, Arnold JJ, Yennawar M, Evans R,  
464 Cameron CE, Lauring AS. 2018. A speed-fidelity trade-off determines the mutation rate and  
465 virulence of an RNA virus. *PLoS Biol* 16:e2006459.
- 466 18. Li C, Wang H, Shi J, Yang D, Zhou G, Chang J, Cameron CE, Woodman A, Yu L. 2019.  
467 Senecavirus-Specific Recombination Assays Reveal the Intimate Link between Polymerase  
468 Fidelity and RNA Recombination. *J Virol*.
- 469 19. Woodman A, Lee KM, Janissen R, Gong YN, Dekker NH, Shih SR, Cameron CE. 2019.  
470 Predicting Intraserotypic Recombination in Enterovirus 71. *J Virol* 93.
- 471 20. Te Velthuis AJW, Long JC, Bauer DLV, Fan RLY, Yen HL, Sharps J, Siegers JY, Killip MJ,  
472 French H, Oliva-Martin MJ, Randall RE, de Wit E, van Riel D, Poon LLM, Fodor E. 2018.  
473 Mini viral RNAs act as innate immune agonists during influenza virus infection. *Nat Microbiol*  
474 3:1234-1242.
- 475 21. Rawson JMO, Nikolaitchik OA, Keele BF, Pathak VK, Hu WS. 2018. Recombination is  
476 required for efficient HIV-1 replication and the maintenance of viral genome integrity. *Nucleic*  
477 *Acids Res* 46:10535-10545.
- 478 22. Woodman A, Arnold JJ, Cameron CE, Evans DJ. 2016. Biochemical and genetic analysis of the  
479 role of the viral polymerase in enterovirus recombination. *Nucleic Acids Res* 44:6883-95.
- 480 23. Poirier EZ, Mounce BC, Rozen-Gagnon K, Hooikaas PJ, Stapleford KA, Moratorio G,  
481 Vignuzzi M. 2015. Low-Fidelity Polymerases of Alphaviruses Recombine at Higher Rates To  
482 Overproduce Defective Interfering Particles. *J Virol* 90:2446-54.
- 483 24. Castro C, Smidansky ED, Arnold JJ, Maksimchuk KR, Moustafa I, Uchida A, Gotte M,  
484 Konigsberg W, Cameron CE. 2009. Nucleic acid polymerases use a general acid for nucleotidyl  
485 transfer. *Nat Struct Mol Biol* 16:212-8.

- 486 25. Crotty S, Maag D, Arnold JJ, Zhong W, Lau JY, Hong Z, Andino R, Cameron CE. 2000. The  
487 broad-spectrum antiviral ribonucleoside ribavirin is an RNA virus mutagen. *Nat Med* 6:1375-9.
- 488 26. Pfeiffer JK, Kirkegaard K. 2003. A single mutation in poliovirus RNA-dependent RNA  
489 polymerase confers resistance to mutagenic nucleotide analogs via increased fidelity. *Proc Natl*  
490 *Acad Sci U S A* 100:7289-94.
- 491 27. Severson WE, Schmaljohn CS, Javadian A, Jonsson CB. 2003. Ribavirin causes error  
492 catastrophe during Hantaan virus replication. *J Virol* 77:481-8.
- 493 28. Vignuzzi M, Stone JK, Andino R. 2005. Ribavirin and lethal mutagenesis of poliovirus:  
494 molecular mechanisms, resistance and biological implications. *Virus Res* 107:173-81.
- 495 29. Sierra M, Airaksinen A, Gonzalez-Lopez C, Agudo R, Arias A, Domingo E. 2007. Foot-and-  
496 mouth disease virus mutant with decreased sensitivity to ribavirin: implications for error  
497 catastrophe. *J Virol* 81:2012-24.
- 498 30. Arias A, Arnold JJ, Sierra M, Smidansky ED, Domingo E, Cameron CE. 2008. Determinants of  
499 RNA-dependent RNA polymerase (in)fidelity revealed by kinetic analysis of the polymerase  
500 encoded by a foot-and-mouth disease virus mutant with reduced sensitivity to ribavirin. *J Virol*  
501 82:12346-55.
- 502 31. Banerjee S, Aponte-Diaz D, Yeager C, Sharma SD, Ning G, Oh HS, Han Q, Umeda M, Hara Y,  
503 Wang RYL, Cameron CE. 2018. Hijacking of multiple phospholipid biosynthetic pathways and  
504 induction of membrane biogenesis by a picornaviral 3CD protein. *PLoS Pathog* 14:e1007086.
- 505 32. Oh HS, Banerjee S, Aponte-Diaz D, Sharma SD, Aligo J, Lodeiro MF, Ning G, Sharma R,  
506 Arnold JJ, Cameron CE. 2018. Multiple poliovirus-induced organelles suggested by comparison  
507 of spatiotemporal dynamics of membranous structures and phosphoinositides. *PLoS Pathog*  
508 14:e1007036.

- 509 33. Dulin D, Vilfan ID, Berghuis BA, Hage S, Bamford DH, Poranen MM, Depken M, Dekker NH.  
510 2015. Elongation-Competent Pauses Govern the Fidelity of a Viral RNA-Dependent RNA  
511 Polymerase. *Cell Rep* 10:983-992.
- 512 34. Lowry K, Woodman A, Cook J, Evans DJ. 2014. Recombination in enteroviruses is a biphasic  
513 replicative process involving the generation of greater-than genome length 'imprecise'  
514 intermediates. *PLoS Pathog* 10:e1004191.
- 515 35. Kumagai A, Ando R, Miyatake H, Greimel P, Kobayashi T, Hirabayashi Y, Shimogori T,  
516 Miyawaki A. 2013. A bilirubin-inducible fluorescent protein from eel muscle. *Cell* 153:1602-  
517 11.
- 518 36. Arnold JJ, Cameron CE. 1999. Poliovirus RNA-dependent RNA polymerase (3Dpol) is  
519 sufficient for template switching in vitro. *J Biol Chem* 274:2706-16.
- 520 37. Kirkegaard K, Baltimore D. 1986. The mechanism of RNA recombination in poliovirus. *Cell*  
521 47:433-43.
- 522 38. Arnold JJ, Cameron CE. 2000. Poliovirus RNA-dependent RNA polymerase (3D(pol)).  
523 Assembly of stable, elongation-competent complexes by using a symmetrical primer-template  
524 substrate (sym/sub). *J Biol Chem* 275:5329-36.
- 525 39. Peliska JA, Benkovic SJ. 1994. Fidelity of in vitro DNA strand transfer reactions catalyzed by  
526 HIV-1 reverse transcriptase. *Biochemistry* 33:3890-5.
- 527 40. Peliska JA, Benkovic SJ. 1992. Mechanism of DNA strand transfer reactions catalyzed by HIV-  
528 1 reverse transcriptase. *Science* 258:1112-8.
- 529 41. Peliska JA, Balasubramanian S, Giedroc DP, Benkovic SJ. 1994. Recombinant HIV-1  
530 nucleocapsid protein accelerates HIV-1 reverse transcriptase catalyzed DNA strand transfer  
531 reactions and modulates RNase H activity. *Biochemistry* 33:13817-23.

- 532 42. Castro C, Smidansky E, Maksimchuk KR, Arnold JJ, Korneeva VS, Gotte M, Konigsberg W,  
533 Cameron CE. 2007. Two proton transfers in the transition state for nucleotidyl transfer  
534 catalyzed by RNA- and DNA-dependent RNA and DNA polymerases. *Proc Natl Acad Sci U S*  
535 *A* 104:4267-72.
- 536 43. Parsley TB, Cornell CT, Semler BL. 1999. Modulation of the RNA binding and protein  
537 processing activities of poliovirus polypeptide 3CD by the viral RNA polymerase domain. *J*  
538 *Biol Chem* 274:12867-76.
- 539 44. Harris KS, Reddigari SR, Nicklin MJ, Hammerle T, Wimmer E. 1992. Purification and  
540 characterization of poliovirus polypeptide 3CD, a proteinase and a precursor for RNA  
541 polymerase. *J Virol* 66:7481-9.
- 542 45. Muller HJ. 1964. The Relation of Recombination to Mutational Advance. *Mutat Res* 106:2-9.
- 543 46. Felsenstein J. 1974. The evolutionary advantage of recombination. *Genetics* 78:737-56.
- 544 47. Chao L. 1990. Fitness of RNA virus decreased by Muller's ratchet. *Nature* 348:454-5.
- 545 48. Kempf BJ, Peersen OB, Barton DJ. 2016. Poliovirus Polymerase Leu420 Facilitates RNA  
546 Recombination and Ribavirin Resistance. *J Virol* 90:8410-21.
- 547 49. Kempf BJ, Watkins CL, Peersen OB, Barton DJ. 2019. Picornavirus RNA Recombination  
548 Counteracts Error Catastrophe. *J Virol* 93.
- 549 50. Gohara DW, Ha CS, Kumar S, Ghosh B, Arnold JJ, Wisniewski TJ, Cameron CE. 1999.  
550 Production of "authentic" poliovirus RNA-dependent RNA polymerase (3D(pol)) by ubiquitin-  
551 protease-mediated cleavage in *Escherichia coli*. *Protein Expr Purif* 17:128-38.
- 552 51. Gohara DW, Crotty S, Arnold JJ, Yoder JD, Andino R, Cameron CE. 2000. Poliovirus RNA-  
553 dependent RNA polymerase (3Dpol): structural, biochemical, and biological analysis of  
554 conserved structural motifs A and B. *J Biol Chem* 275:25523-32.



- 555 52. Furio V, Moya A, Sanjuan R. 2005. The cost of replication fidelity in an RNA virus. Proc Natl  
556 Acad Sci U S A 102:10233-7.
- 557 53. Elena SF, Sanjuan R. 2005. Adaptive value of high mutation rates of RNA viruses: separating  
558 causes from consequences. J Virol 79:11555-8.
- 559 54. Furio V, Moya A, Sanjuan R. 2007. The cost of replication fidelity in human immunodeficiency  
560 virus type 1. Proc Biol Sci 274:225-30.

561

## 562 **Figure Legends**

563 **Figure 1: Serial passage of K359H PV in cell culture leads to additional changes to RdRp-coding**  
564 **sequence. (A)** Changes in RdRp-coding sequence after serial passage of K359H PV. RNA was isolated  
565 from passage 2, converted to cDNA, and amplified by PCR. The electropherogram of the sequenced  
566 PCR product is shown, revealing two amino acid changes: I331F (motif C) and P356S (motif D). **(B)**  
567 Location of I331, P356, and K359 in structure of PV RdRp. Palm, fingers, and thumb subdomains are  
568 shown. Conserved structural motifs are colored: A, *red*; B, *green*; C, *yellow*; D, *blue*; E, *purple*; F,  
569 *orange*; G, *black*. **(C)** Replication phenotypes observed for K359H PV and KH-containing PV mutants  
570 by using a replicon assay. Replication was monitored using a subgenomic replicon firefly luciferase.  
571 Luciferase specific activity is reported in relative light units (*RLU*) per microgram of total protein in the  
572 extract as a function of time post-transfection. Shown is one representative data set.

573

574 **Figure 2: Biological and biochemical characterization of variants of K359H PV and the RdRp**  
575 **reveal that both substitutions are required to achieve a near wild-type phenotype. (A)** One-step  
576 growth analysis. Cells were infected at MOI 10 with the following PVs: WT, IF-KH, PS-KH, and IF-  
577 PS-KH. Viral titer (pfu/mL) was plotted as a function of time post-infection. Duplicate infected  
578 samples were used for plaque assays. Error bars indicate SEM ( $n = 2$ ). **(B)** Specific infectivity. Virus

579 was isolated 24 h post-infection and used for qRT-PCR to determine genomes/mL or plaque assay to  
580 determine pfu/mL, with the quotient yielding specific infectivity, genomes/pfu. **(C)** Ribavirin  
581 sensitivity. HeLa cells were infected at a MOI 0.1 with each PV in the presence of 600  $\mu$ M ribavirin.  
582 After a 24-h incubation at 37 °C, virus was isolated and used for plaque assay. Indicated is the titer of  
583 virus recovered in the presence of ribavirin normalized to that recovered in the absence of ribavirin.  
584 Solid bar indicates the mean of each virus yield. Error bars indicate SEM ( $n = 3$ ). **(D)** Biochemical  
585 analysis. The rate constant for incorporation of a single correct nucleotide, ATP, ( $k_{\text{pol,corr}}$ ) and a single  
586 incorrect nucleotide, GTP, ( $k_{\text{pol,incorr}}$ ) by each PV RdRp was performed as previously described (17).  
587 Data are reported using one significant figure. The error reported is the standard error from the fit of  
588 the data to a single exponential (17).

589

590 **Figure 3: Parameters in addition to RdRp speed and fidelity contribute to recombination**  
591 **efficiency.** **(A)** Schematic of the PV recombination assay used (34). Two RNAs are used: a  
592 replication-competent subgenomic RNA lacking capsid-coding sequence (donor RNA); and a  
593 replication-incompetent full-length genomic RNA with a defective cis-acting replication element  
594 (CRE, indicated by hairpin with defective version indicated by **X**) in 2C-coding sequence (acceptor  
595 RNA). Co-transfection of these RNAs produces infectious virus if recombination occurs. **(B)** The  
596 indicated PV RdRp was engineered into both donor and acceptor RNA and co-transfected into a L929  
597 mouse fibroblast cell line. Infectious virus produced by recombination in L929 cells was determined by  
598 plaque assay using HeLa cells. Each point shown is an independent experiment reflecting the average  
599 of three replicates. When plaques could not be detected, n.d. is indicated. Mean and SEM ( $n=5$ ) are  
600 indicated. **(C)** Schematic of a modified PV recombination assay using an acceptor RNA expressing the  
601 green fluorescent protein, UnaG (35). Recombinants are scored by expression of green fluorescence  
602 instead of plaques, thereby increasing the sensitivity. **(D)** Infectious virus produced by recombination

603 in L929 was scored for infectious virus in HeLa cells 7, 24, and 48 h post-infection for WT and at 48 h  
604 only for K359H and PS-KH.

605

606 **Figure 4: RdRp derivatives incapable of recombination in cells exhibit defects in copy-choice**  
607 **recombination (template switching) in vitro.** (A) Products of reactions using oligo/poly(rA) as  
608 template reflect copy-choice recombination, which requires the template-switching activity of the  
609 RdRp (36). RdRp engages primed template and initiates RNA synthesis. The RdRp-nascent RNA  
610 complex moves to new template from internal positions or as a consequence of reaching the end of  
611 template, thus creating greater-than-template-length products. (B) Specific poly(rU) polymerase  
612 activity (pmol/min/ $\mu$ g) of each RdRp. WT and the indicated PV RdRp variants assessed by using a  
613 poly(rU) polymerase activity assay. Error bars represent SEM ( $n = 3$ ).

614

615 **Figure 5: Properties of the RdRp required for copy-choice recombination in vitro are separable**  
616 **from those required for forced-copy-choice recombination in vitro.** (A) The heteropolymeric,  
617 symmetrical, primed-template substrate (sym/sub) has been used to establish an assay for forced-copy-  
618 choice recombination in vitro (22, 38). RdRp assembles on sym/sub. ATP is added and incorporated to  
619 yield a stable elongation complex. It is this elongation complex that is monitored for extension and  
620 transfer. Transfer is strictly dependent on the presence of an acceptor RNA with complementarity to the  
621 3'-end of donor RNA. (B) Schematic of the experimental design is indicated. Products in boxes are  
622 those observed and monitored by denaturing polyacrylamide gel electrophoresis. (C) Reaction products  
623 were resolved by electrophoresis and detected by phosphorimaging. The only regions of the gel with  
624 bands are shown; these correspond to the sym/sub primer, one-nucleotide-extended primer (n+1), four-  
625 nucleotides-extended product (strong stop) and non-templated addition of nucleotides to that product,  
626 and the transfer product. (D) Transfer products were quantified and are expressed as a percentage

627 relative to the value observed for WT (The concentrations ( $\mu\text{M}$ ) of n+1 formed for WT, K359H, IF-  
628 KH, PS-KH and IF-PS-KH are 0.22, 0.22, 0.32, 0.36 and 0.37, respectively. The concentrations ( $\mu\text{M}$ )  
629 of transfer product for WT, K359H, IF-KH, PS-KH and IF-PS-KH are 0.011, 0.00011, 0.0016, 0.0072  
630 and 0.01, respectively. Overall, transfer efficiency ranges from 1% to 5%. Error bars represent SEM (n  
631 = 2).

632

633 **Figure 6: The biochemical properties of the RdRp are inextricably linked and collectively**  
634 **determine biological outcomes.** PV RdRp is among the most extensively studied enzyme both in cells  
635 and in test tubes (4). A vast majority of these studies have emphasized elaboration of mechanisms  
636 governing efficient incorporation of nucleotides (speed) with high specificity (fidelity). Whether or not  
637 speed is a consequence of fidelity, vice versa, or completely separable is not clear (17, 33, 52-54).  
638 However, these two parameters are linked to recombination efficiency. Moreover, the studies reported  
639 herein point to the existence of a biochemical property other than speed and fidelity, referred to here as  
640 undefined, that contributes to recombination efficiency. Together, the observations reported herein  
641 demonstrate that the current state of the art precludes association of a single biochemical property to  
642 viral fitness, virulence, and/or pathogenesis.

## Figure 1

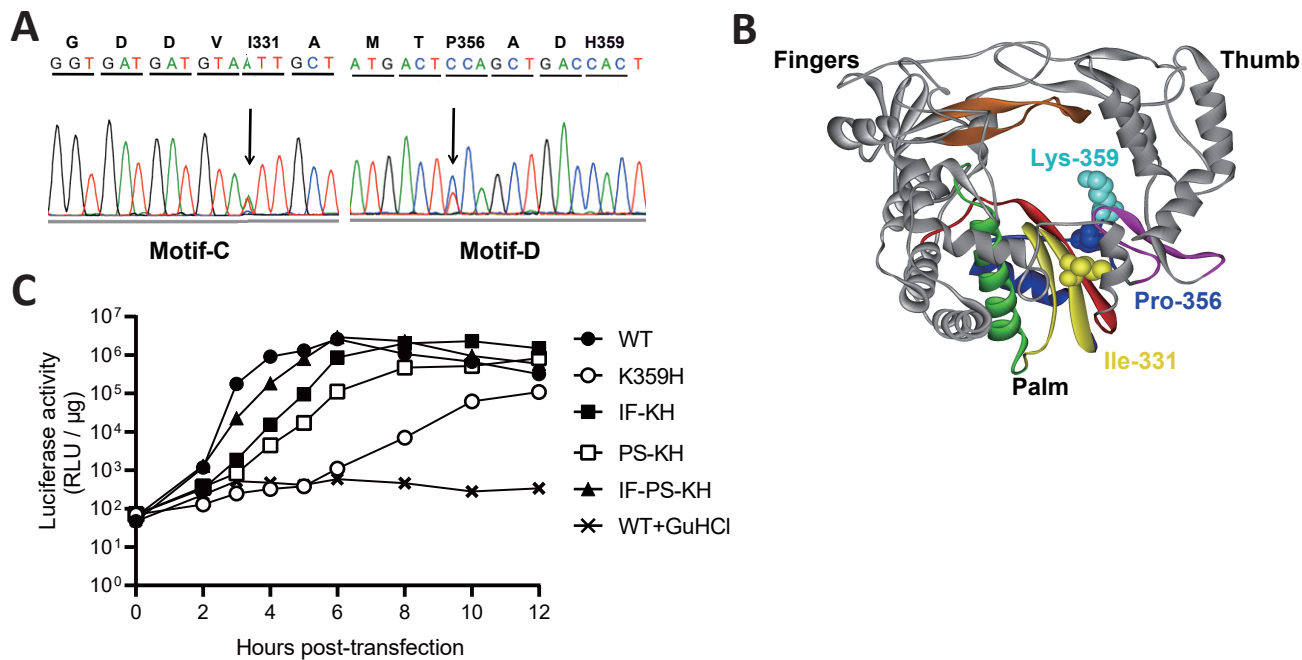

**Figure 1: Serial passage of K359H PV in cell culture leads to additional changes to RdRp-coding sequence.** (A) Changes in RdRp-coding sequence after serial passage of K359H PV. RNA was isolated from passage 2, converted to cDNA, and amplified by PCR. The electropherogram of the sequenced PCR product is shown, revealing two amino acid changes: I331F (motif C) and P356S (motif D). (B) Location of I331, P356, and K359 in structure of PV RdRp. Palm, fingers, and thumb subdomains are shown. Conserved structural motifs are colored: A, red; B, green; C, yellow; D, blue; E, purple; F, orange; G, black. (C) Replication phenotypes observed for K359H PV and KH-containing PV mutants by using a replicon assay. Replication was monitored using a subgenomic replicon firefly luciferase. Luciferase specific activity is reported in relative light units (RLU) per microgram of total protein in the extract as a function of time post-transfection. Shown is one representative data set.

## Figure 2

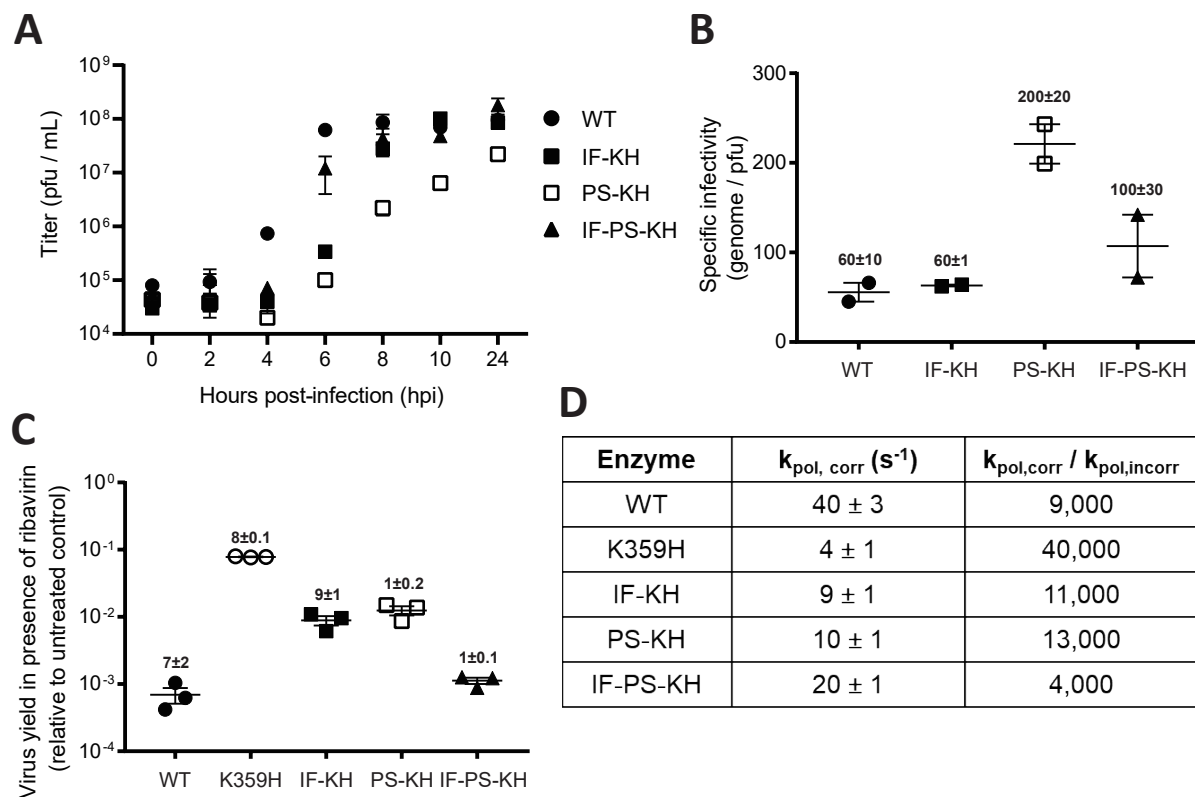

**Figure 2: Biological and biochemical characterization of variants of K359H PV and the RdRp reveal that both substitutions are required to achieve a near wild-type phenotype. (A)** One-step growth analysis. Cells were infected at MOI 10 with the following PVs: WT, IF-KH, PS-KH, and IF-PS-KH. Viral titer (pfu/mL) was plotted as a function of time post-infection. Duplicate infected samples were used for plaque assays. Error bars indicate SEM ( $n = 2$ ). **(B)** Specific infectivity. Virus was isolated 24 h post-infection and used for qRT-PCR to determine genomes/mL or plaque assay to determine pfu/mL, with the quotient yielding specific infectivity, genomes/pfu. **(C)** Ribavirin sensitivity. HeLa cells were infected at a MOI 0.1 with each PV in the presence of 600  $\mu\text{M}$  ribavirin. After a 24-h incubation at 37  $^{\circ}\text{C}$ , virus was isolated and used for plaque assay. Indicated is the titer of virus recovered in the presence of ribavirin normalized to that recovered in the absence of ribavirin. Solid bar indicates the mean of each virus yield. Error bars indicate SEM ( $n = 3$ ). **(D)** Biochemical analysis. The rate constant for incorporation of a single correct nucleotide, ATP, ( $k_{\text{pol, corr}}$ ) and a single incorrect nucleotide, GTP, ( $k_{\text{pol, incorr}}$ ) by each PV RdRp was performed as previously described (17). Data are reported using one significant figure. The error reported is the standard error from the fit of the data to a single exponential (17).

## Figure 3

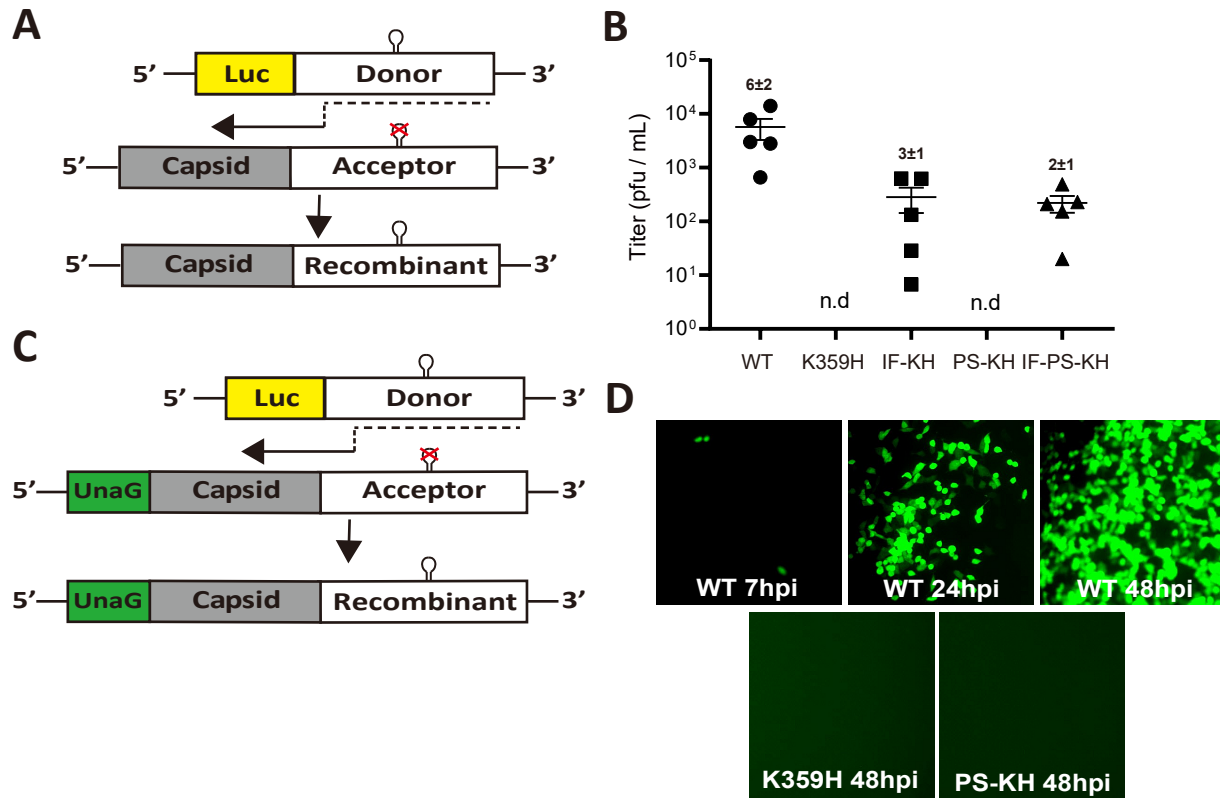

**Figure 3: Parameters in addition to RdRp speed and fidelity contribute to recombination efficiency.** (A) Schematic of the PV recombination assay used (34). Two RNAs are used: a replication-competent subgenomic RNA lacking capsid-coding sequence (donor RNA); and a replication-incompetent full-length genomic RNA with a defective cis-acting replication element (CRE, indicated by hairpin with defective version indicated by X) in 2C-coding sequence (acceptor RNA). Co-transfection of these RNAs produces infectious virus if recombination occurs. (B) The indicated PV RdRp was engineered into both donor and acceptor RNA and co-transfected into a L929 mouse fibroblast cell line. Infectious virus produced by recombination in L929 cells was determined by plaque assay using HeLa cells. Each point shown is an independent experiment reflecting the average of three replicates. When plaques could not be detected, n.d. is indicated. Mean and SEM (n=5) are indicated. (C) Schematic of a modified PV recombination assay using an acceptor RNA expressing the green fluorescent protein, UnaG (35). Recombinants are scored by expression of green fluorescence instead of plaques, thereby increasing the sensitivity. (D) Infectious virus produced by recombination in L929 was scored for infectious virus in HeLa cells 7, 24, and 48 h post-infection for WT and at 48 h only for K359H and PS-KH.

## Figure 4

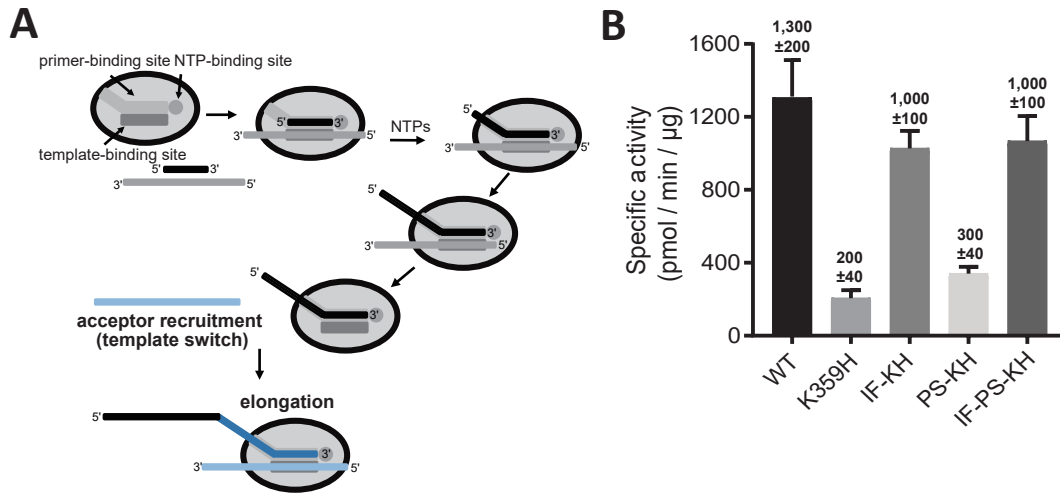

**Figure 4: RdRp derivatives incapable of recombination in cells exhibit defects in copy-choice recombination (template switching) in vitro.** (A) Products of reactions using oligo/poly(rA) as template reflect copy-choice recombination, which requires the template-switching activity of the RdRp (36). RdRp engages primed template and initiates RNA synthesis. The RdRp-nascent RNA complex moves to new template from internal positions or as a consequence of reaching the end of template, thus creating greater-than-template-length products. (B) Specific poly(rU) polymerase activity (pmol/min/ $\mu$ g) of each RdRp. WT and the indicated PV RdRp variants assessed by using a poly(rU) polymerase activity assay. Error bars represent SEM ( $n = 3$ ).



## Figure 5

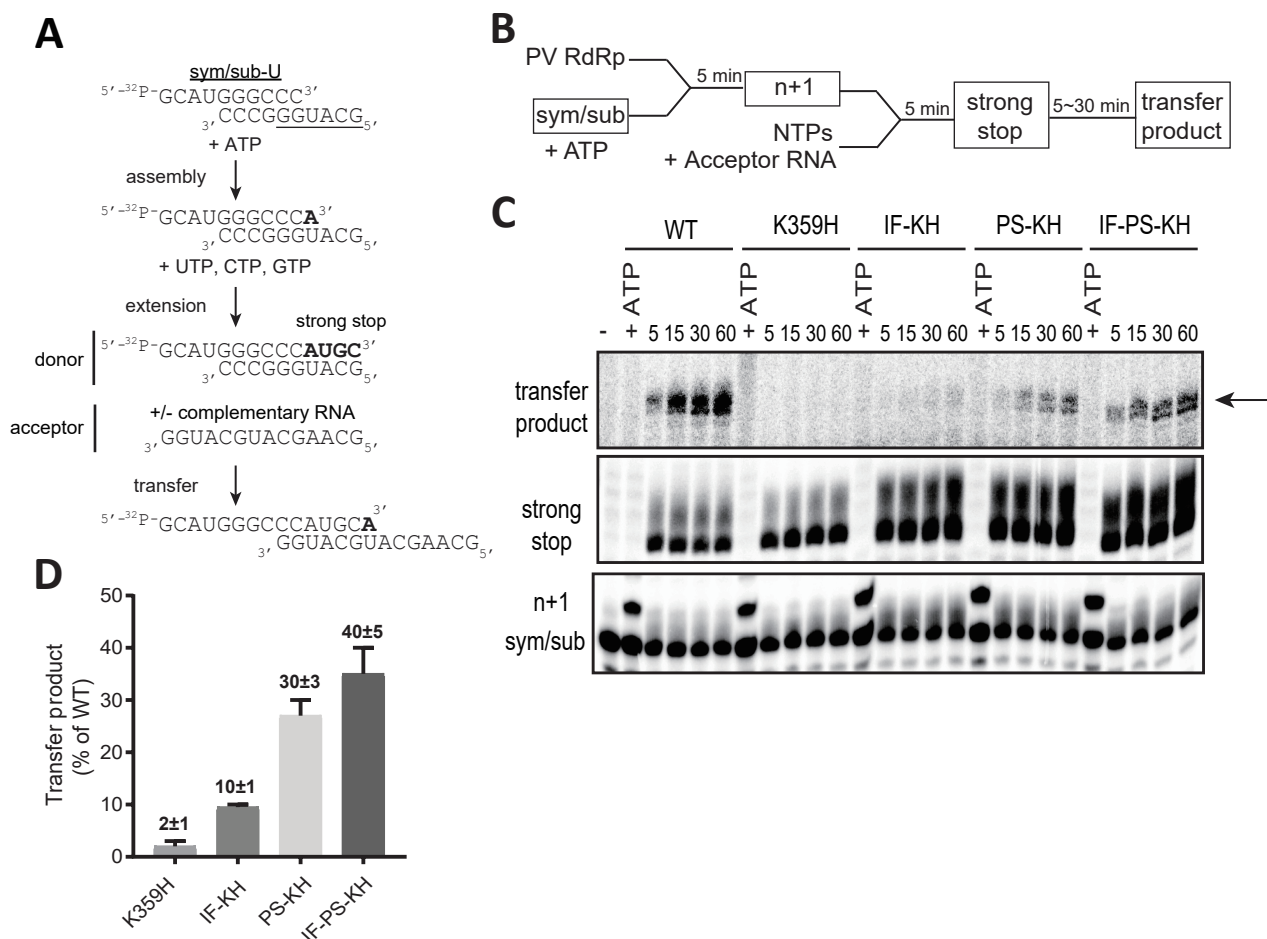

**Figure 5: Properties of the RdRp required for copy-choice recombination in vitro are separable from those required for forced-copy-choice recombination in vitro.** (A) The heteropolymeric, symmetrical, primed-template substrate (sym/sub) has been used to establish an assay for forced-copy-choice recombination in vitro (22, 38). RdRp assembles on sym/sub. ATP is added and incorporated to yield a stable elongation complex. It is this elongation complex that is monitored for extension and transfer. Transfer is strictly dependent on the presence of an acceptor RNA with complementarity to the 3'-end of donor RNA. (B) Schematic of the experimental design is indicated. Products in boxes are those observed and monitored by denaturing polyacrylamide gel electrophoresis. (C) Reaction products were resolved by electrophoresis and detected by phosphorimaging. The only regions of the gel with bands are shown; these correspond to the sym/sub primer, one-nucleotide-extended primer (n+1), four-nucleotides-extended product (strong stop) and non-templated addition of nucleotides to that product, and the transfer product. (D) Transfer products were quantified and are expressed as a percentage relative to the value observed for WT (The concentrations ( $\mu\text{M}$ ) of n+1 formed for WT, K359H, IF-KH, PS-KH and IF-PS-KH are 0.22, 0.22, 0.32, 0.36 and 0.37, respectively. The concentrations ( $\mu\text{M}$ ) of transfer product for WT, K359H, IF-KH, PS-KH and IF-PS-KH are 0.011, 0.00011, 0.0016, 0.0072 and 0.01, respectively. Overall, transfer efficiency ranges from 1% to 5%. Error bars represent SEM ( $n = 2$ ).

**Figure 6**

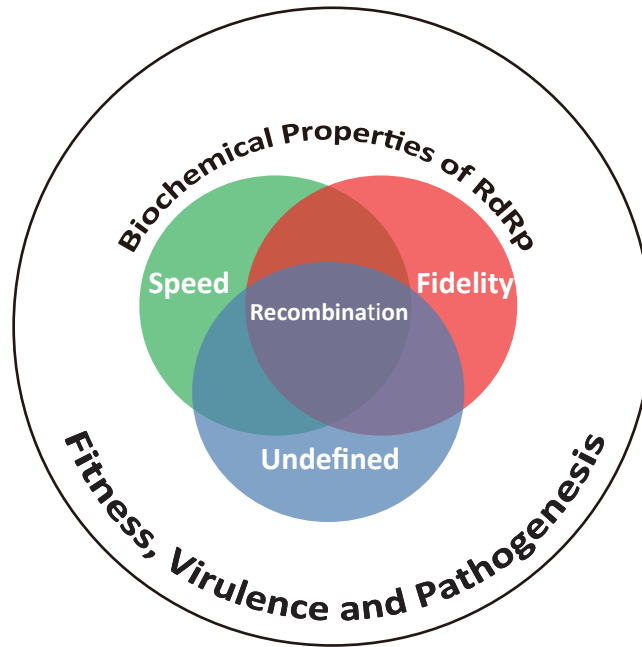

**Figure 6: The biochemical properties of the RdRp are inextricably linked and collectively determine biological outcomes.** PV RdRp is among the most extensively studied enzyme both in cells and in test tubes (4). A vast majority of these studies have emphasized elaboration of mechanisms governing efficient incorporation of nucleotides (speed) with high specificity (fidelity). Whether or not speed is a consequence of fidelity, vice versa, or completely separable is not clear (17, 33, 52-54). However, these two parameters are linked to recombination efficiency. Moreover, the studies reported herein point to the existence of a biochemical property other than speed and fidelity, referred to here as undefined, that contributes to recombination efficiency. Together, the observations reported herein demonstrate that the current state of the art precludes association of a single biochemical property to viral fitness, virulence, and/or pathogenesis.
